# Supplementary material for: Fascin regulates nuclear actin during Drosophila oogenesis
Source: PubMed Central journal article supplement — Mol Biol Cell. 2016 Oct 1;27(19):2965–79. doi: 10.1091/mbc.E15-09-0634 (PMC5042582; doi:10.1091/mbc.e15-09-0634), 2016-10-01
Supplement: supp_E15-09-0634v1_CombinedSupMats.pdf [file supp_E15-09-0634v1_CombinedSupMats.pdf]

# Supplemental Materials

*Molecular Biology of the Cell*

Kelsch et al.

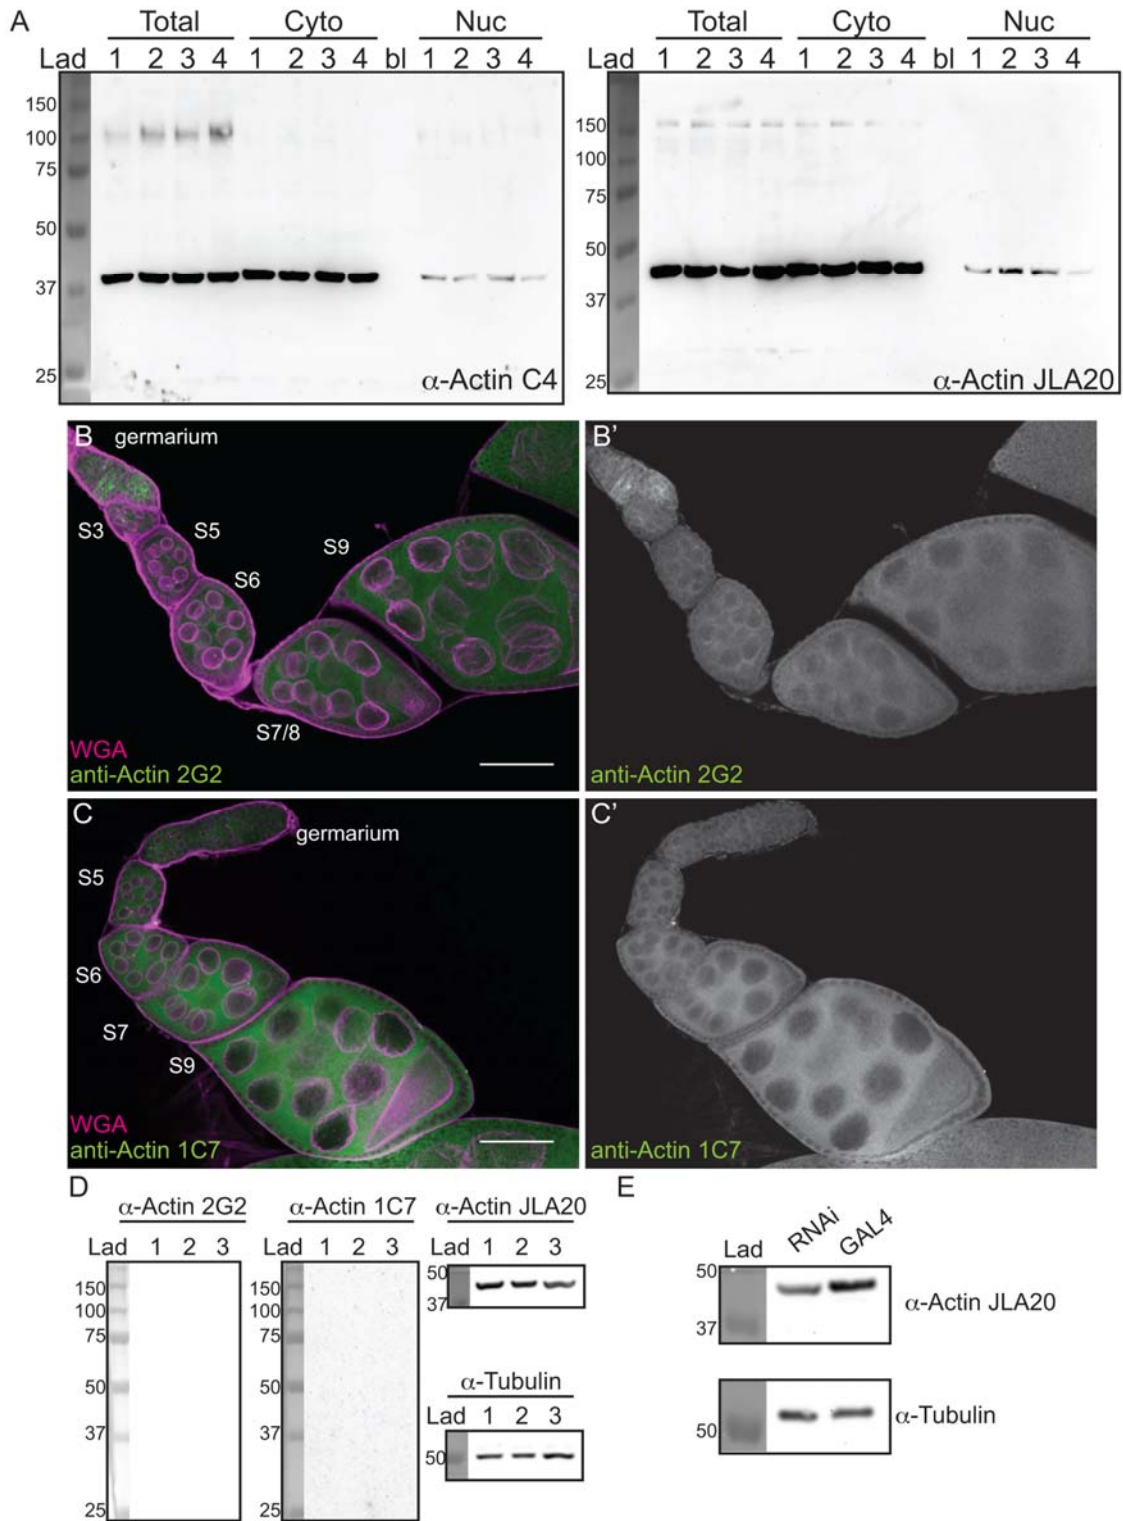

#

**Supplemental Figure 1: Actin antibodies.** A. Whole western blots of the subcellular fraction experiment shown in Figure 1E, labeled with either Anti-Actin C4 or Anti-Actin

JLA20 (four wild-type samples 1-4; Lad = ladder; bl = blank lane). B-C'. Maximum projections of 2-4 confocal slices of follicles. B-C. Merged images: WGA = magenta and antibody = green. B-C'. Antibody = white. B-B'. Anti-Actin 2G2. C-C'. Anti-Actin 1C7. Scale bars = 50  $\mu$ m. D. Western blots of three independent *wild-type* whole ovary lysates, labeled 1-3, blotted for anti-Actin 2G2, anti-Actin 1C7, anti-Actin JLA20 (positive actin control), and anti-~~#~~-Tubulin (loading control). Neither anti-Actin 2G2 or 1C7 recognize *Drosophila* actin by western blotting. Ladder = Lad with molecular weight markers labeled. E. Western blot of whole ovary lysates from *matGAL4; RNAi actin 5C* (labeled RNAi) and *matGAL4* (labeled GAL4) blotted for actin (JLA20) and  $\alpha$ -Tubulin. Ladder = Lad. RNAi knockdown of *actin 5C* in the germline results in a decrease in actin levels.

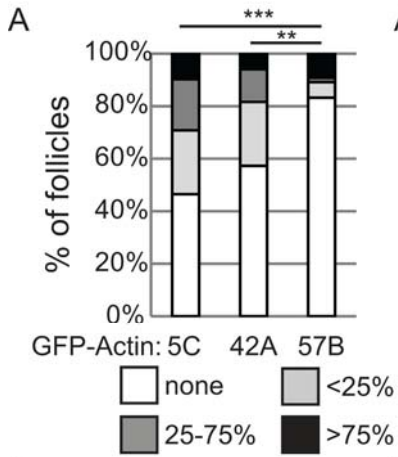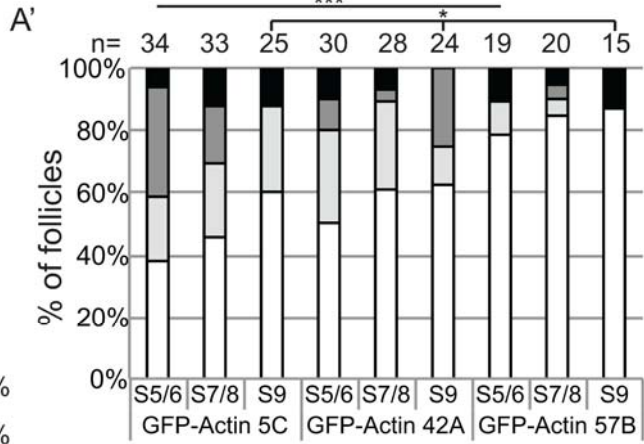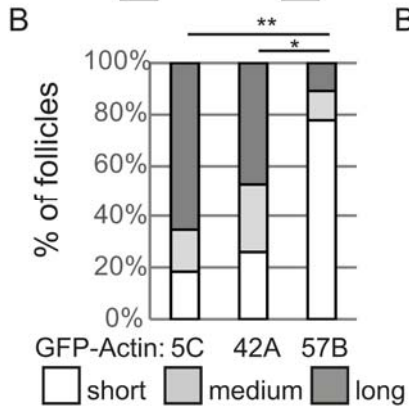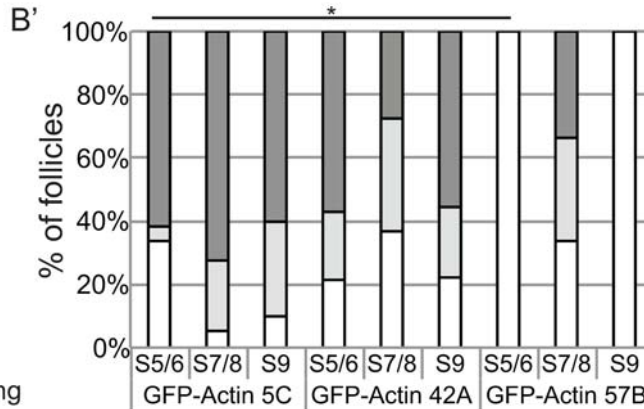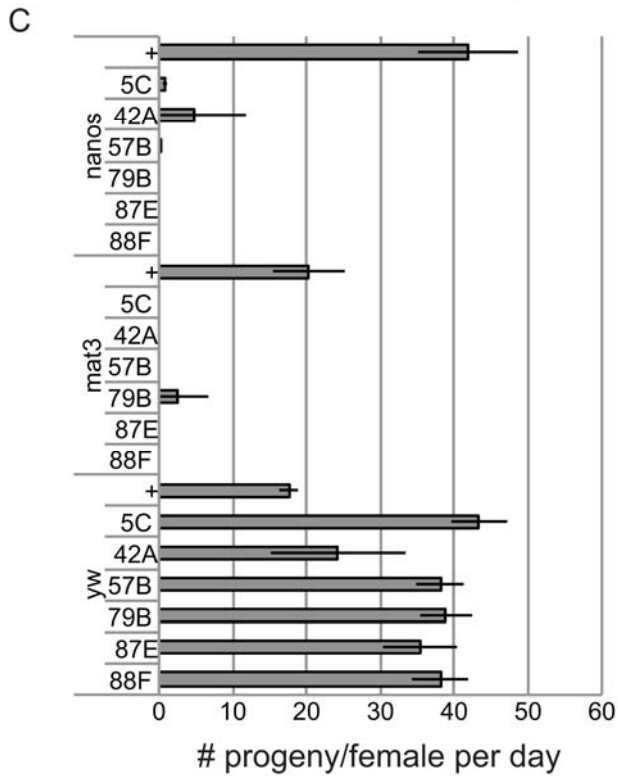

**Supplemental Figure 2: Different actins have distinct abilities to induce nuclear actin rods.** A-B'. Charts of the percentage of follicles of the indicated stages and genotypes (*GFP-Actin*; *matGAL4*) from 5-8 day old females that exhibit particular frequencies and lengths of nuclear GFP-Actin rods. A-B. Charts combining all the stages for each GFP-Actin. A'-B'. Charts show the stage specific distribution for each GFP-Actin; n values for both the frequency and the length are indicated across the top of A'. Each follicle within a confocal stack was scored, in a genotypically-blinded manner, for the percentage of nurse cells exhibiting nuclear actin rods (A-A'; 0,  $\leq 25\%$ , 25-75%, or  $\geq 75\%$ ) and the length of those rods (B-B'; short  $\leq 1/4$  of the nuclear diameter, medium  $\sim 1/2$  diameter, or long  $\geq$  diameter). Actin rod formation is more frequently observed in the earlier stages (S5-8) than in the later stages (S9) for GFP-Actin 5C ( $p < 0.01$  Fisher's Exact test, A'). Germline expression of GFP-Actin 5C and 42A exhibits a higher frequency of nuclear actin rod formation at all stages compared to GFP-Actin 57B (A-A'). The actin rods induced by both GFP-Actin 5C and 42A tend to be long, while those composed of GFP-Actin 57B are short (B-B'). \*\*\* $p < 0.001$ , \*\* $p < 0.01$ , and \* $p < 0.05$  Pearson's Chi-squared test. C. Chart depicting the number of progeny of the indicated genotypes resulting from a female from a 24 hour egg-laying. + = cross to *wild-type*. Germline expression of all six GFP-Actins results in severely reduced fertility or sterility ( $p < 0.001$  compared to GAL4 [+] only, unpaired t-test with Bonferroni correction).

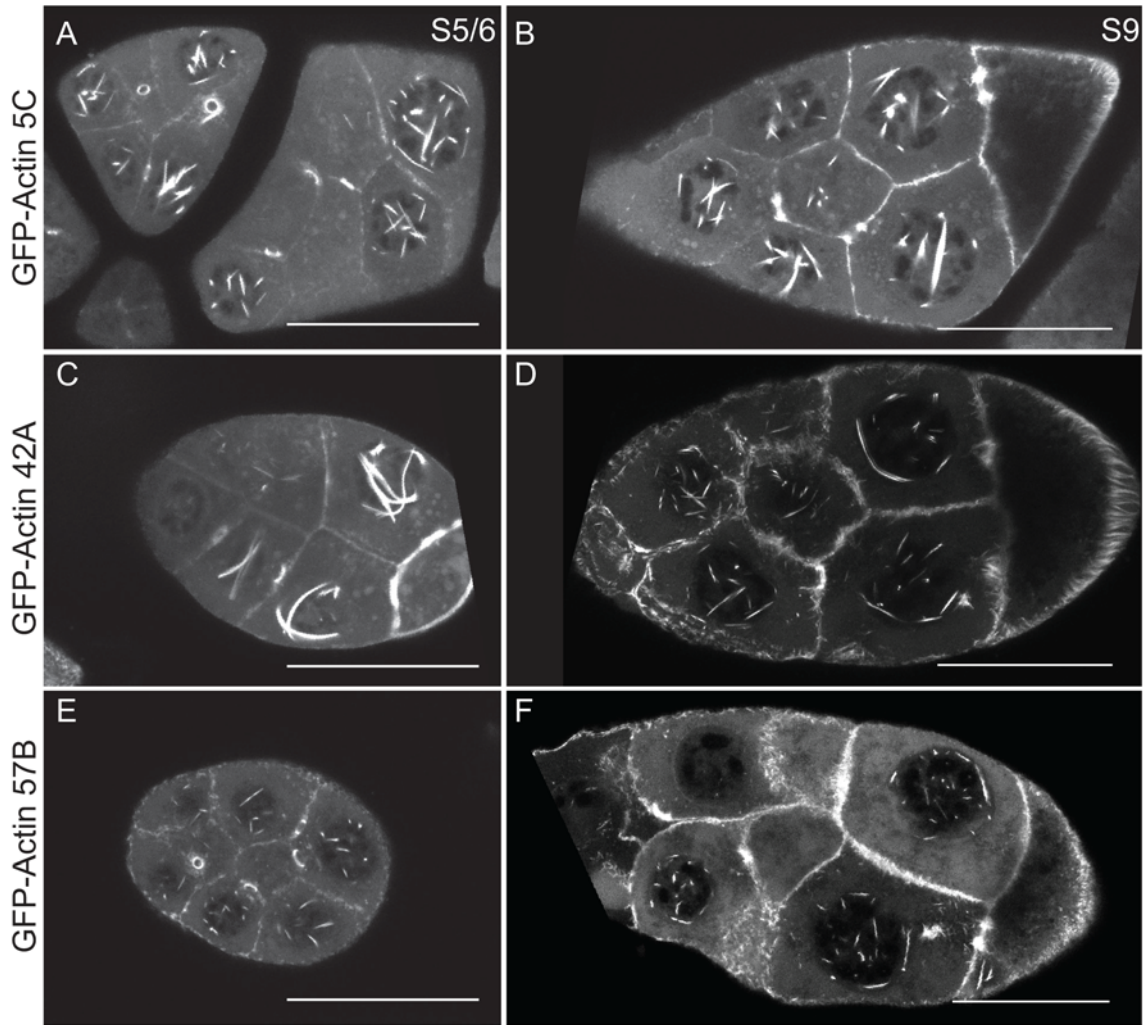

**Supplemental Figure 3: Germline expression of GFP-Actin results in nuclear actin rods.** A-F. Live imaging of follicles expressing the indicated GFP-Actins in the germline using *matGAL4*. Expression of GFP-Actin 5C (A-B) and 42A (C-D) results in long nuclear actin rods, while expression of GFP-Actin 57B results in short rods (E-F). Scale bar = 50  $\mu\text{m}$

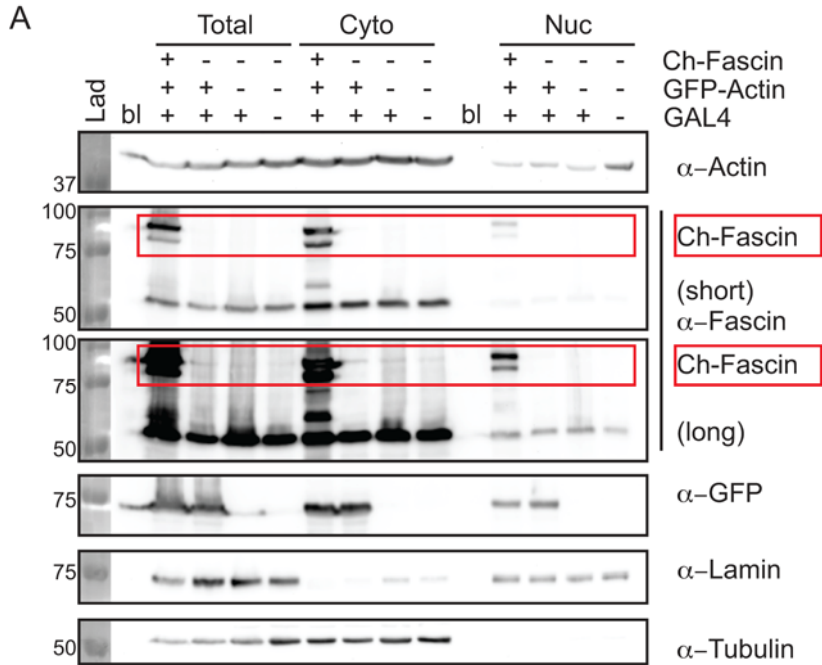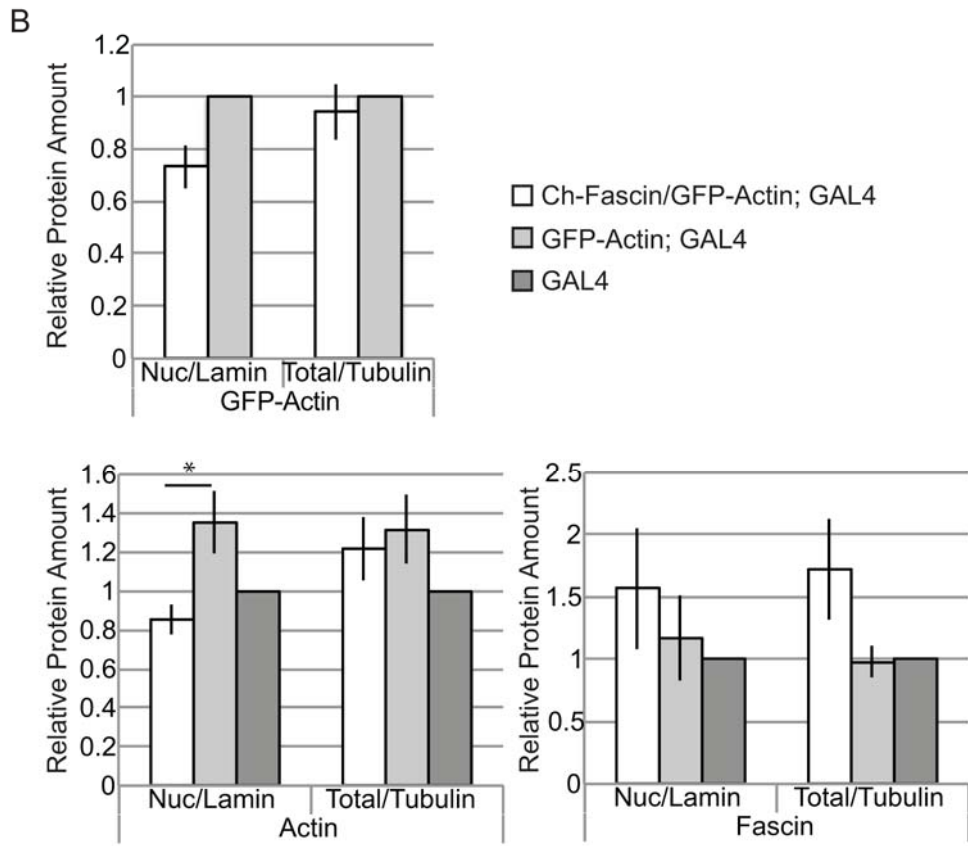

**Supplemental Figure 4: Overexpressing Fascin does not increase nuclear actin, GFP-Actin or endogenous Fascin levels.** A. Representative western blots of subcellular fractionation samples of whole ovary lysates from the indicated genotypes (total lysate,

cytoplasmic fraction, nuclear fraction) blotted for endogenous actin (JLA20), Fascin (two exposures; the bands representing Ch-Fascin are boxed in red), GFP-Actin, Lamin Dm0 (nuclear marker), and  $\alpha$ -Tubulin (cytoplasmic marker). GAL4 = *oskGAL4*; bl = blank lane; Lad = ladder. B. Charts quantifying the relative protein amount of nuclear protein (Actin, endogenous Fascin, or GFP-Actin) to nuclear Lamin and total protein (Actin, Fascin, or GFP-Actin) to total Tubulin from western blots of three subcellular fractionation experiments. For Actin and Fascin values, protein amount was normalized to GAL4 only. For GFP-Actin values, protein amount was normalized to GFP-Actin; GAL4. Error bars = standard error. Overexpression of Fascin does not significantly alter GFP-Actin ( $p > 0.05$  compared to GFP-Actin alone, unpaired t-test with Welch's correction) or endogenous Fascin levels ( $p > 0.05$ , Ordinary one-way ANOVA). Overexpression of Fascin slightly decreases nuclear actin levels compared to GFP-Actin ( $*p = 0.04$ , Ordinary one-way ANOVA), but is not significantly different from the GAL4 control ( $p > 0.05$ , Ordinary one-way ANOVA).

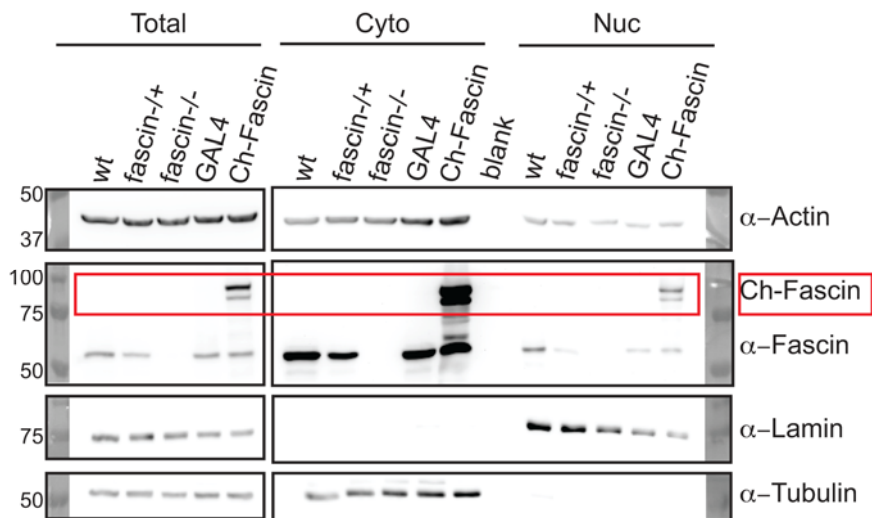

**Supplemental Figure 5: Manipulating Fascin does not alter nuclear actin levels.**

Representative western blots of subcellular fractionation samples of whole ovary lysates of the indicated genotypes (total lysate, cytoplasmic fraction, nuclear fraction) blotted for endogenous actin (JLA20), Fascin (the bands representing Ch-Fascin are boxed in red), Lamin Dm0 (nuclear marker), and  $\alpha$ -Tubulin (cytoplasmic marker). *fascin-/-* = *fascin<sup>sn28</sup>*; GAL4 = *oskGAL4*; Ch-Fascin = *UAS Ch-Fascin/+; oskGAL4/+*.



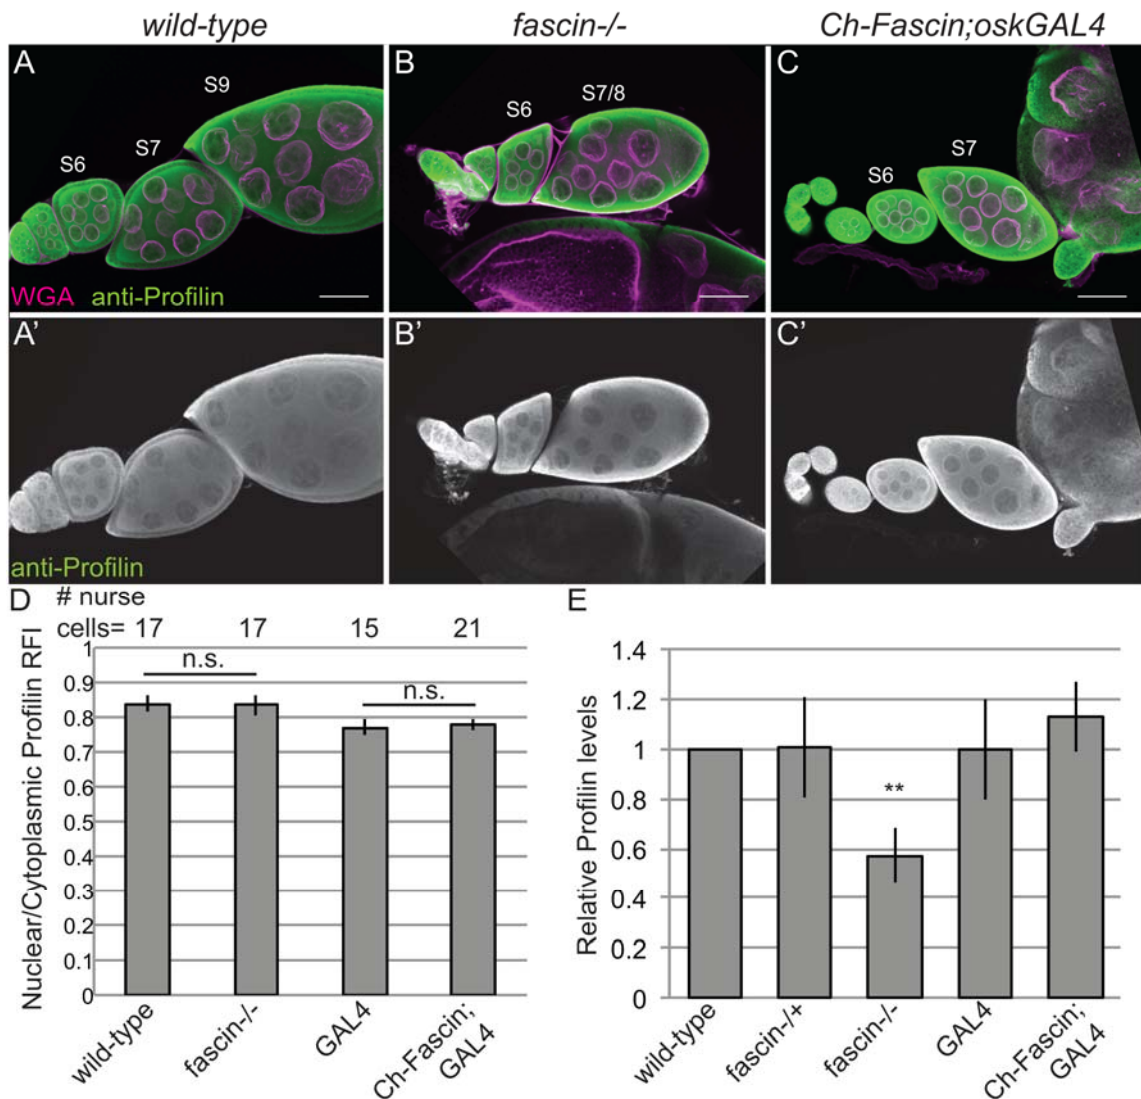

**Supplemental Figure 6: Fascin does not affect nuclear Profilin levels. A-C'.**

Maximum projections of 2-4 confocal slices of S5-9 follicles. A-A'. Wild-type (*yw*). B-B'. *fascin<sup>sn28</sup>/fascin<sup>sn28</sup>*. C-C'. *UAS mCherry-Fascin; oskGAL4*. A-C. Merged images: WGA = magenta and anti-Profilin (Chi 1J) = green. A'-C'. Anti-Profilin = white. Scale bars = 50  $\mu$ m. D. Chart depicting the average nuclear to cytoplasmic relative fluorescence intensity of Profilin in nurse cells from S7/8 follicles; the number of nurse cells (n) examined is indicated across the top of the chart. Briefly, the fluorescence intensity along a line traversing from the cytoplasm into the nucleus from 2-3 nurse cells from a minimum of 5 different follicles from each genotype, in a genotypically-blinded manner, was analyzed as described in the Materials and Methods. Error bars = standard error.

Nuclear Profilin appears normal when either Fascin is lost or overexpressed ( $p > 0.05$ , unpaired t-test with Welch's correction). E. Chart quantifying the relative protein amount of Profilin from western blots of whole ovary lysates of the indicated genotypes. Loss of Fascin reduced total Profilin levels compared to *wild-type* ( $p < 0.01$ , unpaired t-test with Welch's correction).

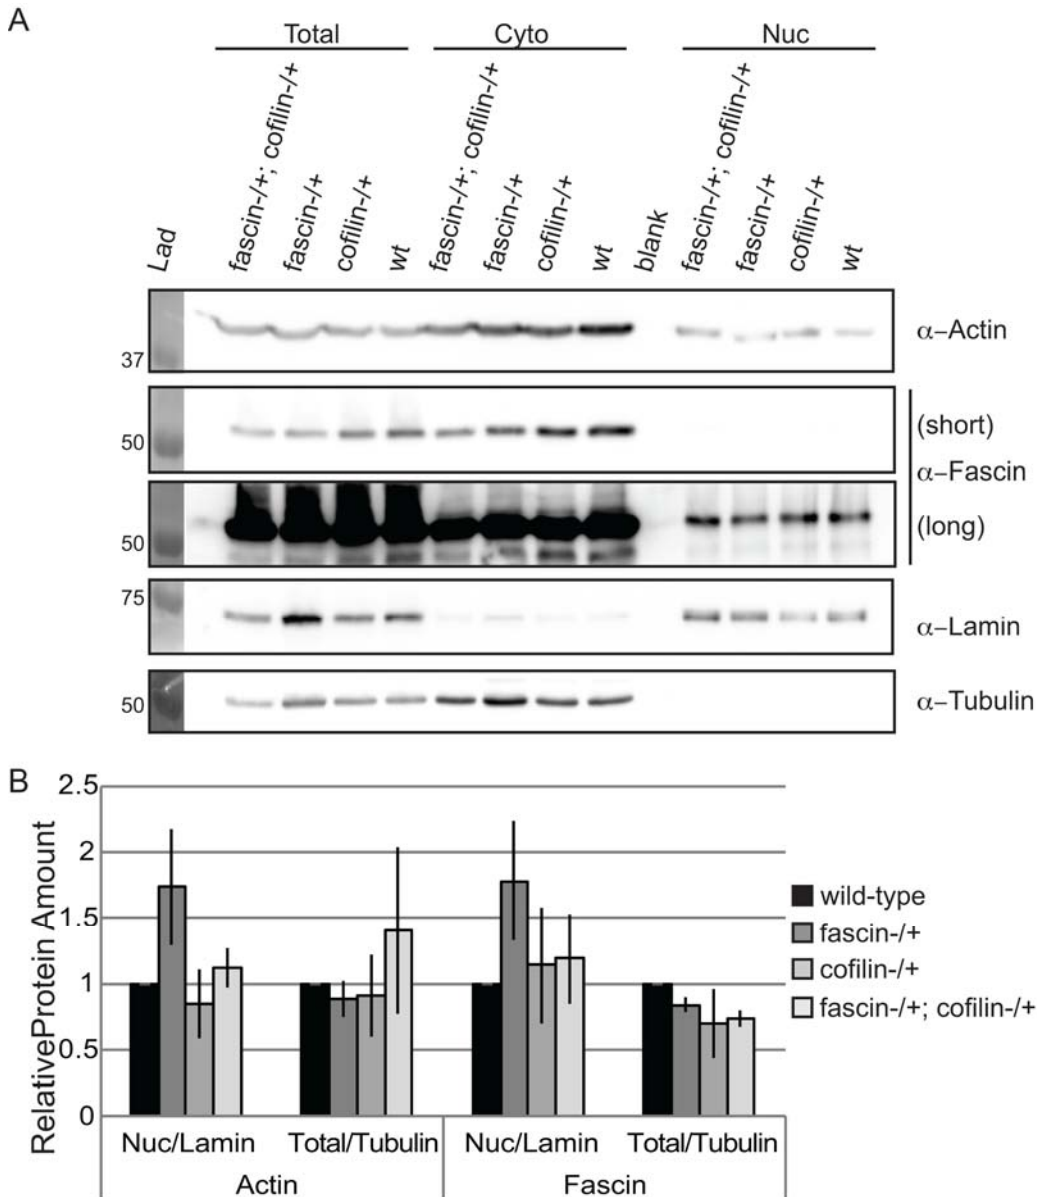

**Supplemental Figure 7: Co-reduction of Fascin and Cofilin does not alter total nuclear actin levels.** A. Representative western blots of subcellular fractionation samples

of whole ovary lysates from the indicated genotypes (total lysate, cytoplasmic fraction, nuclear fraction) blotted for endogenous actin (JLA20), Fascin, Lamin Dm0 (nuclear marker), and  $\alpha$ -Tubulin (cytoplasmic marker). Ladder = lad. B. Chart quantifying the relative protein amount of nuclear protein (Actin and Fascin) to nuclear Lamin and total protein (Actin and Fascin) to total Tubulin from western blots of three subcellular fractionation experiments. Protein amount was normalized to *wild-type*. Error bars = standard error. Nuclear and total actin levels are similar in *fascin*<sup>-/+</sup>; *cofilin*<sup>-/+</sup> compared to *fascin*<sup>-/+</sup>, *cofilin*<sup>-/+</sup>, and *wild-type* ( $p > 0.5$ , Bonferroni's multiple comparisons test). Nuclear and total Fascin levels are similar between all four genotypes ( $p > 0.5$ , Ordinary one-way ANOVA).

**Supplemental Table 1: Statistical analyses of structured nuclear actin and nuclear actin rod frequency and length.** A. Tables of the data represented in Figure 7 quantifying the frequency (none,  $\leq 25\%$ , 25-75%, or  $\geq 75\%$ ) and length (short  $\leq 1/4$  of the nuclear diameter, medium  $\sim 1/2$  diameter, or long  $\geq$  diameter) of nuclear actin rods in S5/6, S7/8, and S9 of Fascin overexpressing follicles. B. Tables of the data represented in Figure 8 quantifying structured nuclear actin (haze, low, medium, or high) during S5/6, S7/8, and S9 of oogenesis from *wild-type*, *fascin*<sup>sn28/sn28</sup>, *GAL4*, and *Ch-Fascin;GAL4* follicles and their corresponding p-values. C. Tables of the data represented in Figure 10 quantifying structured nuclear actin (haze, low, medium, or high) during S5/6, S7/8, and S9 of oogenesis from *fascin*<sup>sn28/+</sup>, *cofilin*<sup>tsr1/+</sup>, and *fascin*<sup>sn28/+</sup>; *cofilin*<sup>tsr1/+</sup> follicles and their corresponding p-values. D. Tables of the data represented in Supplemental Figure 2 quantifying the frequency (none,  $\leq 25\%$ , 25-75%, or  $\geq 75\%$ ) and length (short  $\leq 1/4$  of the nuclear diameter, medium  $\sim 1/2$  diameter, or long  $\geq 1$  diameter) of nuclear actin rods in S5/6, S7/8, and S9 of follicles expressing *GFP-Actin 5C*, *GFP-Actin 42A*, and *GFP-Actin 57*, and their corresponding p-values.

**A. Figure 7.**

|                                   | Frequency     |      |         |      |                            |      |         |      |           |      |         |      |
|-----------------------------------|---------------|------|---------|------|----------------------------|------|---------|------|-----------|------|---------|------|
|                                   | S5/6          |      |         |      | S7/8                       |      |         |      | S9        |      |         |      |
|                                   | None          | <25% | 25%-75% | >75% | None                       | <25% | 25%-75% | >75% | None      | <25% | 25%-75% | >75% |
| <i>Cherry-Fascin/GFP-Actin 5C</i> | 13            | 22   | 30      | 17   | 0                          | 26   | 21      | 11   | 12        | 10   | 11      | 7    |
| <i>GFP-Actin 5C</i>               | 21            | 10   | 5       | 4    | 19                         | 13   | 0       | 2    | 13        | 6    | 5       | 1    |
| Pearson's Chi-squared test        | p = 0.0001525 |      |         |      | p = 2.67x10 <sup>-10</sup> |      |         |      | p = 0.206 |      |         |      |

|                                   | Length        |        |      |                            |        |      |             |        |      |
|-----------------------------------|---------------|--------|------|----------------------------|--------|------|-------------|--------|------|
|                                   | S5/6          |        |      | S7/8                       |        |      | S9          |        |      |
|                                   | Short         | Medium | Long | Short                      | Medium | Long | Short       | Medium | Long |
| <i>Cherry-Fascin/GFP-Actin 5C</i> | 5             | 4      | 60   | 0                          | 11     | 47   | 3           | 3      | 23   |
| <i>GFP-Actin 5C</i>               | 7             | 4      | 8    | 8                          | 1      | 6    | 2           | 6      | 4    |
| Pearson's Chi-squared test        | p = 0.0001785 |        |      | p = 2.783x10 <sup>-8</sup> |        |      | p = 0.01066 |        |      |

**B. Figure 8.**

| Stage analysis of <i>wild-type</i> |                           |     |        |      |
|------------------------------------|---------------------------|-----|--------|------|
|                                    | Haze                      | Low | Medium | High |
| S5/6                               | 341                       | 110 | 93     | 100  |
| S7/8                               | 415                       | 28  | 37     | 0    |
| S9                                 | 348                       | 12  | 0      | 0    |
| Pearson's Chi-squared test         | p < 2.2x10 <sup>-16</sup> |     |        |      |

| Stage analysis of <i>wild-type</i> |      |                        |                        |
|------------------------------------|------|------------------------|------------------------|
| p-value                            | S5/6 | S7/8                   | S9                     |
| S5/6                               |      | 9.03x10 <sup>-42</sup> | 1.34x10 <sup>-57</sup> |
| S7/8                               |      |                        | 4.36x10 <sup>-10</sup> |
| S9                                 |      |                        |                        |

| Endogenous nuclear actin quantification |                           |     |        |      |                           |     |        |      |      |     |        |      |
|-----------------------------------------|---------------------------|-----|--------|------|---------------------------|-----|--------|------|------|-----|--------|------|
|                                         | S5/6                      |     |        |      | S7/8                      |     |        |      | S9   |     |        |      |
|                                         | Haze                      | Low | Medium | High | Haze                      | Low | Medium | High | Haze | Low | Medium | High |
| <i>wild-type</i>                        | 341                       | 110 | 93     | 100  | 415                       | 28  | 37     | 0    | 348  | 12  | 0      | 0    |
| <i>fascin<sup>-/-</sup></i>             | 439                       | 115 | 44     | 17   | 359                       | 13  | 1      | 2    | 267  | 3   | 0      | 0    |
| Pearson's Chi-squared test              | p < 2.2x10 <sup>-16</sup> |     |        |      | p = 2.85x10 <sup>-7</sup> |     |        |      | NA   |     |        |      |

| Endogenous nuclear actin quantification |                           |     |        |      |             |     |        |      |      |     |        |      |
|-----------------------------------------|---------------------------|-----|--------|------|-------------|-----|--------|------|------|-----|--------|------|
|                                         | S5/6                      |     |        |      | S7/8        |     |        |      | S9   |     |        |      |
|                                         | Haze                      | Low | Medium | High | Haze        | Low | Medium | High | Haze | Low | Medium | High |
| <i>GAL4</i>                             | 275                       | 137 | 69     | 164  | 338         | 58  | 41     | 28   | 414  | 30  | 6      | 0    |
| <i>Cherry-Fascin; GAL4</i>              | 55                        | 296 | 58     | 86   | 234         | 53  | 26     | 47   | 305  | 34  | 6      | 0    |
| Pearson's Chi-squared test              | p < 2.2x10 <sup>-16</sup> |     |        |      | p = 0.00268 |     |        |      | NA   |     |        |      |

| Endogenous nuclear actin quantification |                            |     |        |      |                             |     |        |      |      |     |        |      |
|-----------------------------------------|----------------------------|-----|--------|------|-----------------------------|-----|--------|------|------|-----|--------|------|
|                                         | S5/6                       |     |        |      | S7/8                        |     |        |      | S9   |     |        |      |
|                                         | Haze                       | Low | Medium | High | Haze                        | Low | Medium | High | Haze | Low | Medium | High |
| <i>wild-type</i>                        | 341                        | 110 | 93     | 100  | 415                         | 28  | 37     | 0    | 348  | 12  | 0      | 0    |
| <i>GAL4</i>                             | 275                        | 137 | 69     | 164  | 338                         | 58  | 41     | 28   | 414  | 30  | 6      | 0    |
| Pearson's Chi-squared test              | $p < 2.141 \times 10^{-6}$ |     |        |      | $p = 4.855 \times 10^{-10}$ |     |        |      | NA   |     |        |      |

**C. Figure 10.**

| S5/6                                                         |                           |     |        |      |
|--------------------------------------------------------------|---------------------------|-----|--------|------|
|                                                              | Haze                      | Low | Medium | High |
| <i>fascin</i> <sup>-/+</sup>                                 | 462                       | 212 | 41     | 140  |
| <i>cofilin</i> <sup>-/+</sup>                                | 628                       | 74  | 65     | 148  |
| <i>fascin</i> <sup>-/+</sup> ; <i>cofilin</i> <sup>-/+</sup> | 652                       | 20  | 51     | 27   |
| Pearson's Chi-squared test                                   | $p < 2.2 \times 10^{-16}$ |     |        |      |

| S5/6                                                         |                              |                               |                                                              |
|--------------------------------------------------------------|------------------------------|-------------------------------|--------------------------------------------------------------|
| p-value                                                      | <i>fascin</i> <sup>-/+</sup> | <i>cofilin</i> <sup>-/+</sup> | <i>fascin</i> <sup>-/+</sup> ; <i>cofilin</i> <sup>-/+</sup> |
| <i>fascin</i> <sup>-/+</sup>                                 |                              | $4.20957 \times 10^{-21}$     | $2.34808 \times 10^{-63}$                                    |
| <i>cofilin</i> <sup>-/+</sup>                                |                              |                               | $1.39979 \times 10^{-23}$                                    |
| <i>fascin</i> <sup>-/+</sup> ; <i>cofilin</i> <sup>-/+</sup> |                              |                               |                                                              |

| S7/8                                                         |                             |     |        |      |
|--------------------------------------------------------------|-----------------------------|-----|--------|------|
|                                                              | Haze                        | Low | Medium | High |
| <i>fascin</i> <sup>-/+</sup>                                 | 460                         | 47  | 62     | 1    |
| <i>cofilin</i> <sup>-/+</sup>                                | 377                         | 54  | 60     | 4    |
| <i>fascin</i> <sup>-/+</sup> ; <i>cofilin</i> <sup>-/+</sup> | 480                         | 27  | 3      | 0    |
| Pearson's Chi-squared test                                   | $p < 9.599 \times 10^{-15}$ |     |        |      |

| S7/8                                                         |                              |                               |                                                              |
|--------------------------------------------------------------|------------------------------|-------------------------------|--------------------------------------------------------------|
| p-value                                                      | <i>fascin</i> <sup>-/+</sup> | <i>cofilin</i> <sup>-/+</sup> | <i>fascin</i> <sup>-/+</sup> ; <i>cofilin</i> <sup>-/+</sup> |
| <i>fascin</i> <sup>-/+</sup>                                 |                              | 0.1575728                     | $4.31129 \times 10^{-15}$                                    |
| <i>cofilin</i> <sup>-/+</sup>                                |                              |                               | $6.62606 \times 10^{-19}$                                    |
| <i>fascin</i> <sup>-/+</sup> ; <i>cofilin</i> <sup>-/+</sup> |                              |                               |                                                              |

| S9                                                           |                            |     |        |      |
|--------------------------------------------------------------|----------------------------|-----|--------|------|
|                                                              | Haze                       | Low | Medium | High |
| <i>fascin</i> <sup>-/+</sup>                                 | 331                        | 27  | 2      | 0    |
| <i>cofilin</i> <sup>-/+</sup>                                | 336                        | 30  | 1      | 8    |
| <i>fascin</i> <sup>-/+</sup> ; <i>cofilin</i> <sup>-/+</sup> | 329                        | 1   | 0      | 0    |
| Pearson's Chi-squared test                                   | $p < 1.858 \times 10^{-7}$ |     |        |      |

| S9                                                           |                              |                               |                                                              |
|--------------------------------------------------------------|------------------------------|-------------------------------|--------------------------------------------------------------|
| p-value                                                      | <i>fascin</i> <sup>+/+</sup> | <i>cofilin</i> <sup>-/+</sup> | <i>fascin</i> <sup>-/+</sup> ; <i>cofilin</i> <sup>-/+</sup> |
| <i>fascin</i> <sup>-/+</sup>                                 |                              | 0.02011352                    | 1.91627x10 <sup>-1</sup>                                     |
| <i>cofilin</i> <sup>-/+</sup>                                |                              |                               | 4.86282x10 <sup>-9</sup>                                     |
| <i>fascin</i> <sup>-/+</sup> ; <i>cofilin</i> <sup>-/+</sup> |                              |                               |                                                              |

#### D. Supplemental Figure 2.

| Frequency (S5-S9)          |              |      |         |      |
|----------------------------|--------------|------|---------|------|
|                            | None         | <25% | 25%-75% | >75% |
| <i>GFP-Actin 5C; GAL4</i>  | 43           | 22   | 18      | 9    |
| <i>GFP-Actin 42A; GAL4</i> | 47           | 20   | 10      | 5    |
| <i>GFP-Actin 57B; GAL4</i> | 45           | 3    | 1       | 5    |
| Pearson's Chi-squared test | p = 0.000482 |      |         |      |

| Frequency (S5-S9)          |                           |                            |                            |
|----------------------------|---------------------------|----------------------------|----------------------------|
| p-value                    | <i>GFP-Actin 5C; GAL4</i> | <i>GFP-Actin 42A; GAL4</i> | <i>GFP-Actin 57B; GAL4</i> |
| <i>GFP-Actin 5C; GAL4</i>  |                           | 0.3753682                  | 0.00004689257              |
| <i>GFP-Actin 42A; GAL4</i> |                           |                            | 0.001512837                |
| <i>GFP-Actin 57B; GAL4</i> |                           |                            |                            |

| Length (S5-S9)             |              |        |      |
|----------------------------|--------------|--------|------|
|                            | Short        | Medium | Long |
| <i>GFP-Actin 5C; GAL4</i>  | 9            | 8      | 32   |
| <i>GFP-Actin 42A; GAL4</i> | 9            | 9      | 16   |
| <i>GFP-Actin 57B; GAL4</i> | 7            | 1      | 1    |
| Pearson's Chi-squared test | p = 0.005404 |        |      |

| Length (S5-S9)             |                           |                            |                            |
|----------------------------|---------------------------|----------------------------|----------------------------|
| p-value                    | <i>GFP-Actin 5C; GAL4</i> | <i>GFP-Actin 42A; GAL4</i> | <i>GFP-Actin 57B; GAL4</i> |
| <i>GFP-Actin 5C; GAL4</i>  |                           | 0.269721252                | 0.002741905                |
| <i>GFP-Actin 42A; GAL4</i> |                           |                            | 0.034147688                |
| <i>GFP-Actin 57B; GAL4</i> |                           |                            |                            |

| S5/6 Frequency             |             |      |         |      |
|----------------------------|-------------|------|---------|------|
|                            | None        | <25% | 25%-75% | >75% |
| <i>GFP-Actin 5C; GAL4</i>  | 13          | 7    | 12      | 2    |
| <i>GFP-Actin 42A; GAL4</i> | 15          | 9    | 3       | 3    |
| <i>GFP-Actin 57B; GAL4</i> | 15          | 2    | 0       | 2    |
| Pearson's Chi-squared test | p = 0.01114 |      |         |      |

| S5/6 Frequency             |                           |                            |                            |
|----------------------------|---------------------------|----------------------------|----------------------------|
| p-value                    | <i>GFP-Actin 5C; GAL4</i> | <i>GFP-Actin 42A; GAL4</i> | <i>GFP-Actin 57B; GAL4</i> |
| <i>GFP-Actin 5C; GAL4</i>  |                           | 0.165578606                | 0.008259774                |
| <i>GFP-Actin 42A; GAL4</i> |                           |                            | 0.165578606                |
| <i>GFP-Actin 57B; GAL4</i> |                           |                            |                            |

| S7/8 Frequency             |             |      |         |      |
|----------------------------|-------------|------|---------|------|
|                            | None        | <25% | 25%-75% | >75% |
| <i>GFP-Actin 5C; GAL4</i>  | 15          | 8    | 6       | 4    |
| <i>GFP-Actin 42A; GAL4</i> | 17          | 8    | 1       | 2    |
| <i>GFP-Actin 57B; GAL4</i> | 17          | 1    | 1       | 1    |
| Pearson's Chi-squared test | p = 0.07829 |      |         |      |

| S9 Frequency               |              |      |         |      |
|----------------------------|--------------|------|---------|------|
|                            | None         | <25% | 25%-75% | >75% |
| <i>GFP-Actin 5C; GAL4</i>  | 15           | 7    | 0       | 3    |
| <i>GFP-Actin 42A; GAL4</i> | 15           | 3    | 6       | 0    |
| <i>GFP-Actin 57B; GAL4</i> | 13           | 0    | 0       | 2    |
| Pearson's Chi-squared test | p = 0.004025 |      |         |      |

| S9 Frequency               |                           |                            |                            |
|----------------------------|---------------------------|----------------------------|----------------------------|
| p-value                    | <i>GFP-Actin 5C; GAL4</i> | <i>GFP-Actin 42A; GAL4</i> | <i>GFP-Actin 57B; GAL4</i> |
| <i>GFP-Actin 5C; GAL4</i>  |                           | 0.01675403                 | 0.06322224                 |
| <i>GFP-Actin 42A; GAL4</i> |                           |                            | 0.01675403                 |
| <i>GFP-Actin 57B; GAL4</i> |                           |                            |                            |

| S5/6 Length                |             |        |      |
|----------------------------|-------------|--------|------|
|                            | Short       | Medium | Long |
| <i>GFP-Actin 5C; GAL4</i>  | 7           | 1      | 13   |
| <i>GFP-Actin 42A; GAL4</i> | 3           | 3      | 8    |
| <i>GFP-Actin 57B; GAL4</i> | 4           | 0      | 0    |
| Pearson's Chi-squared test | p = 0.03143 |        |      |

| S5/6 Length                |                           |                            |                            |
|----------------------------|---------------------------|----------------------------|----------------------------|
| p-value                    | <i>GFP-Actin 5C; GAL4</i> | <i>GFP-Actin 42A; GAL4</i> | <i>GFP-Actin 57B; GAL4</i> |
| <i>GFP-Actin 5C; GAL4</i>  |                           | 0.45466065                 | 0.0926087                  |
| <i>GFP-Actin 42A; GAL4</i> |                           |                            | 0.04901961                 |
| <i>GFP-Actin 57B; GAL4</i> |                           |                            |                            |

| S7/8 Length                |            |        |      |
|----------------------------|------------|--------|------|
|                            | Short      | Medium | Long |
| <i>GFP-Actin 5C; GAL4</i>  | 1          | 4      | 13   |
| <i>GFP-Actin 42A; GAL4</i> | 4          | 4      | 3    |
| <i>GFP-Actin 57B; GAL4</i> | 1          | 1      | 1    |
| Pearson's Chi-squared test | p = 0.1262 |        |      |

| S9 Length                  |            |        |      |
|----------------------------|------------|--------|------|
|                            | Short      | Medium | Long |
| <i>GFP-Actin 5C; GAL4</i>  | 1          | 3      | 6    |
| <i>GFP-Actin 42A; GAL4</i> | 2          | 2      | 5    |
| <i>GFP-Actin 57B; GAL4</i> | 2          | 0      | 0    |
| Pearson's Chi-squared test | p = 0.1113 |        |      |
